# Supplementary material for: Switching the direction of plasmon-induced photocurrents by cytochrome c at Au–TiO2 nanocomposites
Source: Royal Society of Chemistry journal article supplement (doi:10.1039/b911344d), 2009-01-01
Supplement: b911344d.pdf [file b911344d.pdf]

## Supplementary Information

# Switching Direction of Plasmon-Induced Photocurrents by Cytochrome *c* at Au-TiO<sub>2</sub> Nanocomposites

Anwei Zhu, Yongping Luo and Yang Tian\*

Department of Chemistry, Tongji University, Siping Road 1239, Shanghai  
200092, P. R. China

## 1. Experimental

### *Chemicals and Materials*

Horse heart cytochrome *c* (cyt. *c*, oxidized state, MW 12, 384) and hydrogen tetrachloroaurate (III) tetrahydrate were purchased from Sigma–Aldrich. The reduced form of cyt. *c* on the modified electrode was generated by applying potentials of  $-0.18$  V vs. Ag|AgCl on the surface–bound cyt. *c* for 200 s.<sup>1</sup> TiO<sub>2</sub> nanoneedles (FT–2000) was obtained from Ishihara Sangyo Kaisha. Gold nanoparticles (Au NPs) was prepared by the method previously reported.<sup>2</sup> Indium tin oxides (ITO)–coated glass plates with square resistance of  $\sim 10 \Omega \text{ cm}^{-2}$  were purchased from Shenzhen Nanbo Display Technology Co. Ltd. All other reagents were of analytical grade.

### ***Modification of electrodes***

A high conductive TiO<sub>2</sub> nanoneedles film-coated ITO electrode was prepared from a TiO<sub>2</sub> nanoneedles sol by spin-coating, followed by sintering the electrode at 723 K for 1 h. And then the nanostructured TiO<sub>2</sub> film was immersed in the suspension of Au NPs for 12-15 h and rinsed with water to obtain Au NPs deposited on TiO<sub>2</sub> nanoneedles film (Au/TiO<sub>2</sub>). The as-prepared Au/TiO<sub>2</sub> was adsorbed in 25 mM phosphate buffer solution (PBS, pH 7.2) containing 0.2 mM cyt. *c* for about 30 min at 4 °C in refrigerator and then denoted as Au/TiO<sub>2</sub>/cyt. *c*.

### ***Apparatus and Measurements***

SEM images of needle-TiO<sub>2</sub> and Au/TiO<sub>2</sub> nanoneedles film were taken by a Quanta 2000 FEG (FEI Company). All electrochemical and photoelectrochemical measurements were carried out in a home-made three-electrode cell using a KCl-saturated Ag|AgCl electrode as reference electrode and a platinum wire as counter electrode coupled with a computer-controlled CHI 660C electrochemical workstation (Shanghai, China). The working electrode was irradiated with a visible light ( $\lambda > 450$  nm) from the back using a Xe lamp with an ultraviolet cutoff filter. Action spectrum for the photocurrent changes was collected by using a Xe lamp with an ultraviolet cutoff filter and an appropriate band-pass filter (fwhm 10nm). The supporting electrolyte was 25 mM PBS which was purged with N<sub>2</sub> for at least 30 min prior to experiments and a nitrogen atmosphere was kept over the solution in the cell.

## 2. Spectroscopic Characterization for Bioactivity of Cyt. c Adsorbed on Au/TiO<sub>2</sub> Film

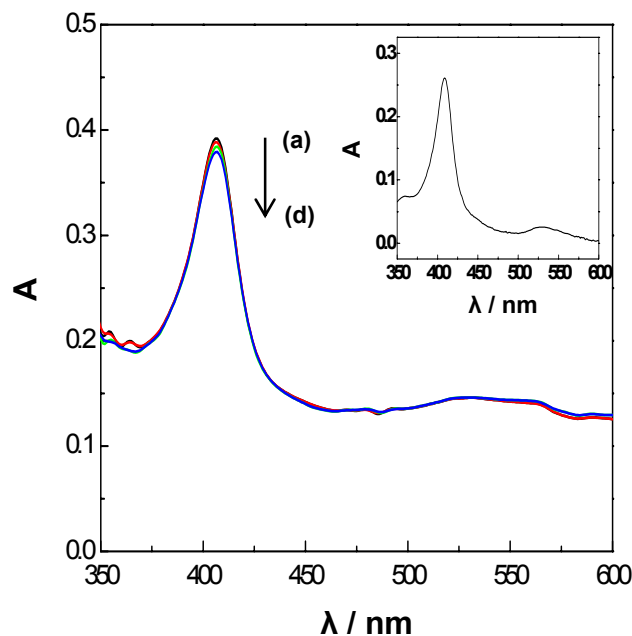

**Figure S1.** UV-vis absorption spectra of cyt. *c* adsorbed on the Au/TiO<sub>2</sub> film at variable time intervals of visible light irradiation: (a) 0 h, (b) 1 h, (c) 2h, (d) 3h. Inset: UV-vis absorption spectrum of 0.2 mM cyt. *c* solution.

Figure S1(a) depicts UV-vis absorption spectrum of cyt. *c* confined on the Au/TiO<sub>2</sub> film. The band for cyt. *c* adsorbed on the Au/TiO<sub>2</sub> film is located at 407 nm, just a 2 nm blue shift with that of native cyt. *c* solution (inset in Figure R1), suggesting that no obvious denaturation occurred after cyt. *c* adsorbed on Au/TiO<sub>2</sub> film. Furthermore, no shift of the band for cyt. *c* adsorbed on Au/TiO<sub>2</sub> film was observed under the continuous visible light ( $\lambda > 420$  nm) irradiation up to 3 h (Figure S1, curve b-d). These results indicated that cyt. *c* adsorbed on Au/TiO<sub>2</sub> film maintained its native bioactivity, even under plasmon excitation.

## References

1. D. P. Hedges, D. J. Richardson, D. A. Russell, *Langmuir* 2004, **20**, 1901.
2. K. R. Brown, D. G. Walter, M. J. Natan, *Chem. Mater.*, 2000, **12**, 306.
